# Supplementary material for: Regulation of Tissue Factor by CD44 Supports Coagulant Activity in Breast Tumor Cells
Source: MDPI journal article supplement (doi:10.3390/cancers14133288), 2022-07-05
Supplement: s1 [file s1]

Supplementary Material

# Regulation of Tissue Factor by CD44 Supports Coagulant Activity in Breast Tumor Cells

Amélie V. Villard <sup>1,†</sup>, Anthony Genna <sup>1,†</sup>, Justine Lambert <sup>1</sup>, Marianna Volpert <sup>2</sup>, Agnès Noël <sup>1</sup>, Brett Hollier <sup>2</sup>, Myriam Polette <sup>3</sup>, Aline M. Vanwysberghe <sup>1</sup> and Christine Gilles <sup>1,\*</sup>

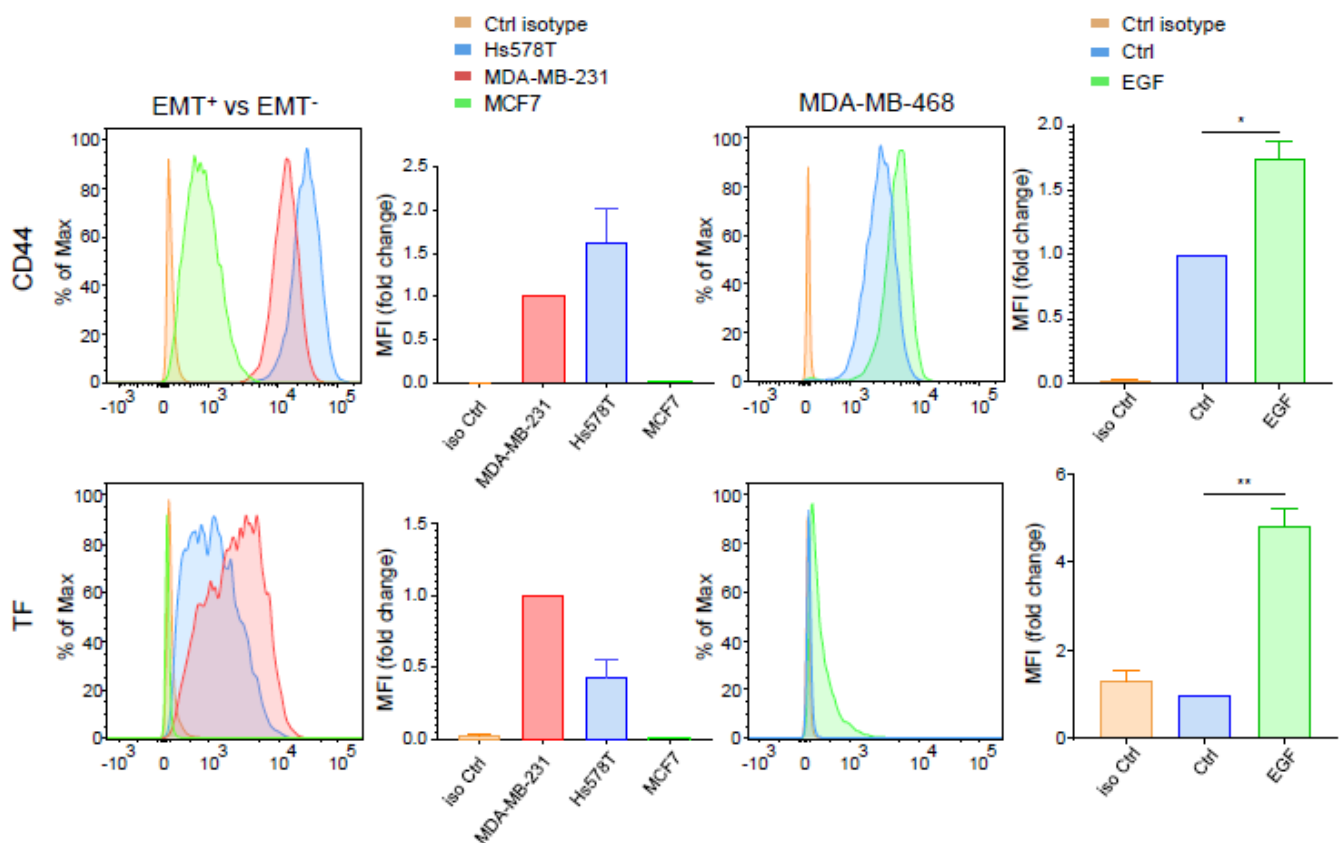

**Figure S1.** TF and CD44 coexpress in EMT cellular contexts. FACS analyses and associated Mean Fluorescence Intensity (MFI) quantifications of CD44 and TF in EMT<sup>+</sup> (MDA-MB-231 and Hs578T) vs EMT<sup>-</sup> (MCF7) and in EMT-inducible (MDA-MB-468 treated or not (Ctrl) with EGF to induced EMT) cell lines. \*,  $p < 0.05$ ; \*\*,  $p < 0.01$ .

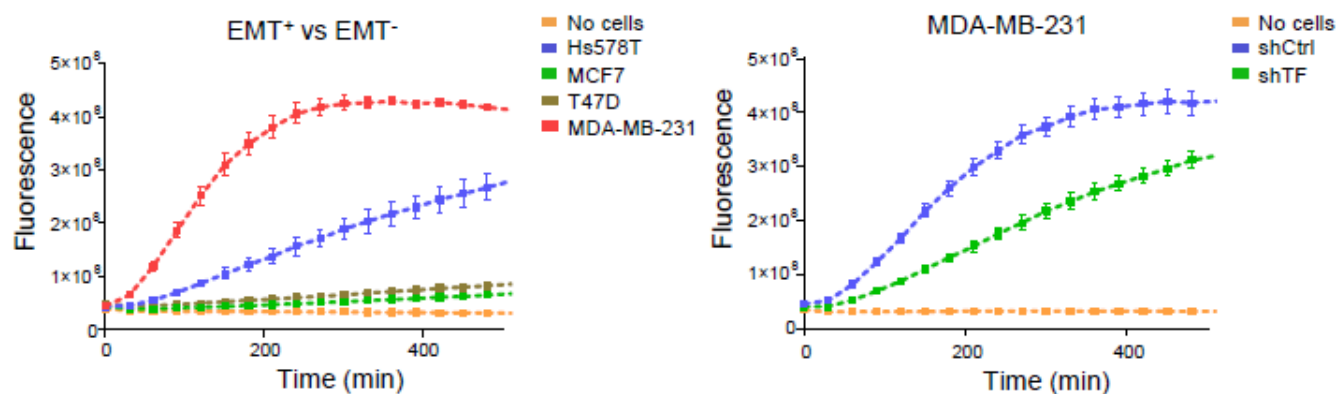

**Figure S2.** Validation of the enzymatic fluorescent coagulation assay. Enzymatic fluorescent coagulation assays performed in EMT<sup>+</sup> (MDA-MB-231 and Hs578T) vs EMT<sup>-</sup> (MCF7 and T47D), and in EMT<sup>+</sup> (MDA-MB-231) cell lines transduced with a shRNA directed against TF (shTF) or a non-targeting shRNA (shCtrl). Fluorescence intensity was followed during 8 hrs.

# Blots for Figure 1A

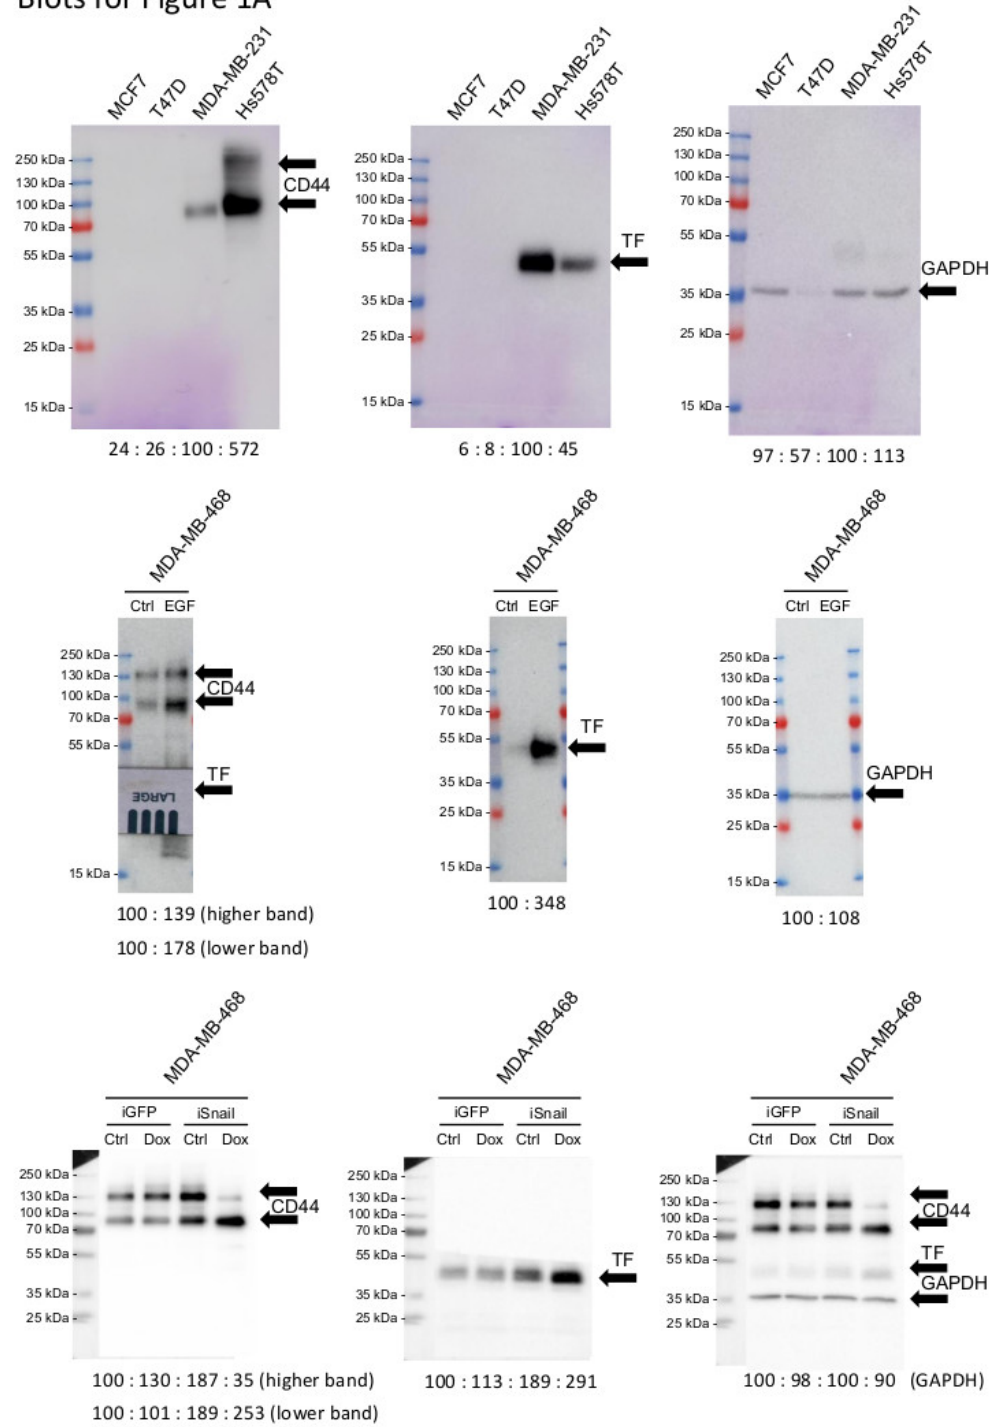

# Blots for Figure 2A

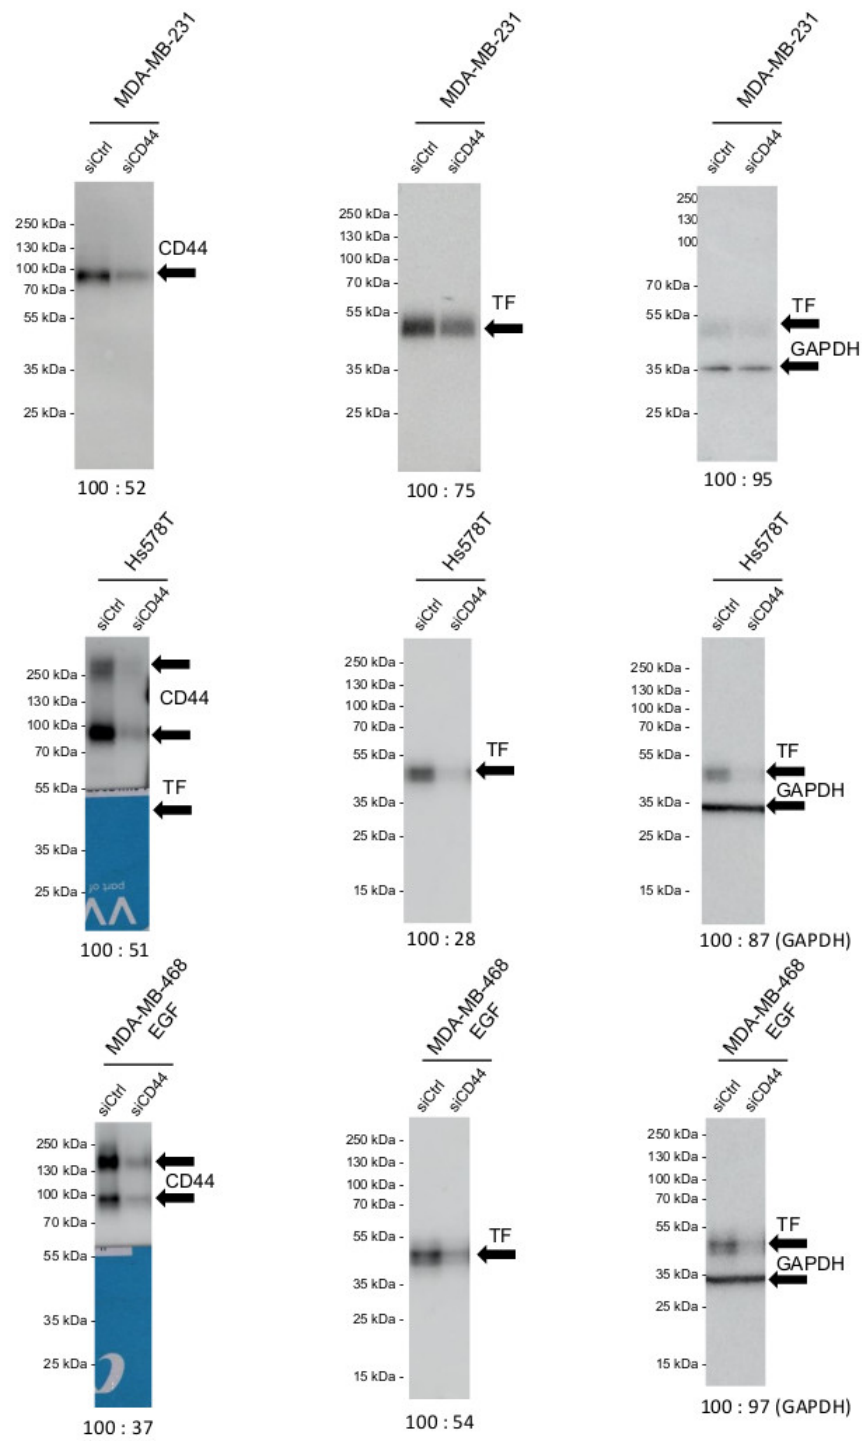

Blots for Figure 5A

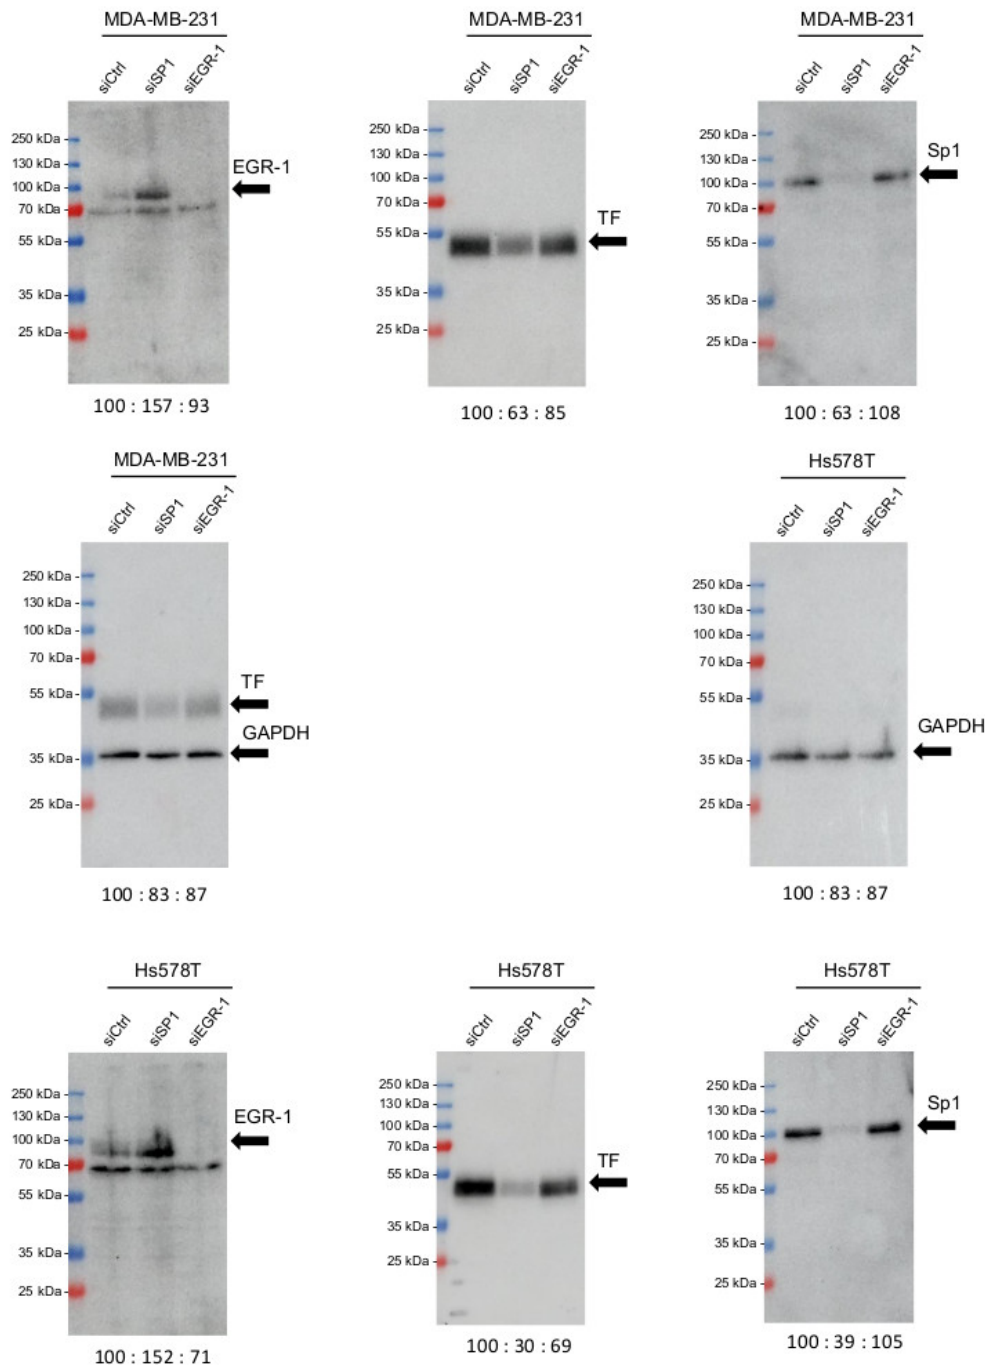

## Blots for Figure 5B

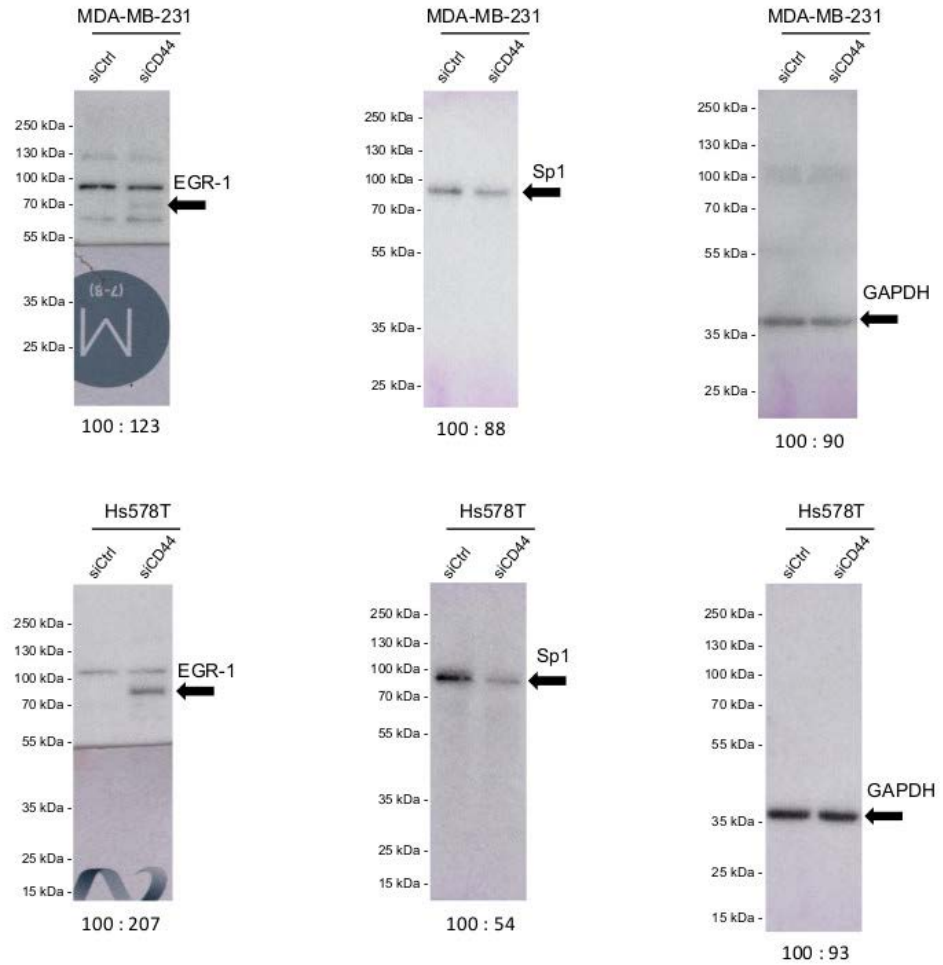

**Figure S3.** Uncropped Western blot figures

**Table S1.** Overview of Study Design.

| Analyses                                                           | Methods                                                                                                                                                                                  |
|--------------------------------------------------------------------|------------------------------------------------------------------------------------------------------------------------------------------------------------------------------------------|
| CD44 and TF expression in EMT <sup>+</sup> breast tumor cell lines | FACS, Western blotting for TF and CD44 on MDA-MB-231, Hs578T, MDA-MB-468 (induced or not to EMT).                                                                                        |
| Impact of CD44 silencing on TF expression                          | FACS, Western blotting for TF and CD44 after CD44 siRNA transfection in MDA-MB-231, Hs578T, MDA-MB-468 (induced or not to EMT).                                                          |
| Impact of CD44 silencing on coagulant properties                   | Enzymatic fluorescent coagulation assays and visual clot assays on MDA-MB-231, Hs578T, MDA-MB-468 (induced or not to EMT) transfected with CD44 siRNA.                                   |
| Impact of CD44 silencing on metastatic seeding                     | Experimental metastasis assays on MDA-MB-231, Hs578T, MDA-MB-468 (induced or not to EMT) transfected with CD44 siRNA                                                                     |
| Analysis of a TF transcriptional regulation by CD44                | TF-promoter reporter assays<br>Western blotting and RT-qPCR (for TF or Sp1 or EGR-1) after CD44 silencing, Sp1 silencing or mithramycin treatments in MDA-MB-231 cells and Hs578T cells. |

**Table S2.** list of siRNA.

| siRNA    | Sequences                 |
|----------|---------------------------|
| siCtrl 1 | 5'-CAGAACUAGAUUGCGAAUA-3' |
| siCtrl 2 | 5'-GCCCAAUAUAUGGUCAGAA-3' |
| siCtrl 3 | 5'-GAUACUAUCUAGUCUAGAC-3' |

|                         |                            |
|-------------------------|----------------------------|
| siCD44 1 <sup>[1]</sup> | 5'–GCAGAU CGAUUUGAAUAUA–3' |
| siCD44 2 <sup>[1]</sup> | 5'–GUAUGACACAUAUUGCUUC–3'  |
| siCD44 3 <sup>[2]</sup> | 5'–AAAUGGUCGCUACAGCAUC–3'  |
| siSP1 1 <sup>[3]</sup>  | 5'–GCAACAUGGGAAUUAUGAA–3'  |
| siSP1 2 <sup>[3]</sup>  | 5'–GGCAGACCUUUACAACUCA–3'  |
| siSP1 3 <sup>[3]</sup>  | 5'–CCACAAGCCCCAAACAAUCA–3' |
| siEGR1 1*               | 5'–CGACAGCAGUCCCAUUUAC–3'  |
| siEGR1 2*               | 5'–GGACAUGACAGCAACCUUU–3'  |
| siEGR1 3*               | 5'–GACCUGAAGGCCCUCAAUA–3'  |

\* from Dharmacon™.

**Table S3.** list of primer sequences used for qPCR analyses.

| Genes                | Primers | Sequences                       |
|----------------------|---------|---------------------------------|
| hFT                  | Forward | 5'–CAGACAGCCCGGTAGAGTGT–3'      |
|                      | Reverse | 5'–CCACAGCTCCAATGATGTAGAA–3'    |
| hGAPDH               | Forward | 5'–TGCCGTCTAGAAAAACCTGCCAAA–3'  |
|                      | Reverse | 5'–CTCTCTTCTCTTGTGCTCTTGCT–3'   |
| hGAPDH (nested–qPCR) | Forward | 5'–ACCCTACTGATGATGACGTGAGCA–3'  |
|                      | Reverse | 5'–TGGAAATGTGTCTTGGTCTCTGGTA–3' |
| mGAPDH               | Forward | 5'–TGTCCTCGTGGATCTGAC–3'        |
|                      | Reverse | 5'–GAGTTGCTGTTGAAGTCGCA–3'      |

**Table S4.** list of antibodies used for western blotting analyses.

| Anticorps                      | Clone      | Source              | References |
|--------------------------------|------------|---------------------|------------|
| Mouse anti–human tissue factor | VD8        | Sekisui Diagnostics | ADG4508    |
| Mouse anti–human CD44          | 2C5        | R&D Systems         | BBA10      |
| Rabbit anti–human Sp1          | Polyclonal | Cell Signaling      | 5931       |
| Rabbit anti–human EGR–1        | 15F7       | Cell Signaling      | 4153       |
| Mouse anti–human GAPDH         | 6C5        | Merck Millipore     | MAB374     |
| Goat anti–rabbit/HRP           | Polyclonal | Cell Signaling      | 7074       |
| Horse anti–mouse/HRP           | Polyclonal | Cell Signalling     | 7076       |

**Table S5.** list of antibodies used for FACS analyses.

| Anticorps                               | Clone                                | Source      | References |
|-----------------------------------------|--------------------------------------|-------------|------------|
| Alexa fluor® 488 anti–mouse/human CD44  | Monoclonal Rat IgG2b, κ Clone IM7    | Biolegend   | 103015     |
| Alexa fluor® 594 anti–human TF          | Monoclonal Mouse IgG1 Clone –#323519 | R&D Systems | FAB23391T  |
| Alexa Fluor® 488 Isotype Ctrl Anti–body | Monoclonal Rat IgG2b, κ              | Biolegend   | 400625     |
| Alexa Fluor® 594 Isotype Ctrl Anti–body | Monoclonal Mouse IgG1                | R&D Systems | FAB110T    |

**Table S6.** list of primer sequences used for sequencing.

| Genes | Primers | Sequences                      |
|-------|---------|--------------------------------|
| hCD44 | Forward | 5'–GCAGCACTTCAGGAGGTTACATCT–3' |
|       | Reverse | 5'–TGTGGACATGAAGATTGGGGTGTA–3' |

**Table S7.** list of plasmids used for dual–luciferase reporter assays.

| Plasmids | Regions             | Source  | References           |
|----------|---------------------|---------|----------------------|
| –2106    | –2106 nt to +121 nt | Addgene | 15440 <sup>[4]</sup> |
| –227     | –227 nt to +121 nt  | Addgene | 15442 <sup>[4]</sup> |
| –192     | –192 nt to +121 nt  | Addgene | 15446 <sup>[4]</sup> |
| –111     | –111 nt to +121 nt  | Addgene | 15447 <sup>[4]</sup> |

## Reference

1. Li, C.Z., Liu, B., Wen, Z-Q., Li, HY., Inhibition of CD44 expression by small interfering RNA to suppress the growth and metastasis of ovarian cancer cells in vitro and in vivo. *Folia Biol (Praha)*, 2008. **54**(6): p. 180-6.
2. Singleton, P.A., Salgia, R., Moreno-Vinasco, L., Moitra, J., Sammani, S., Mirzapoiazova, T., Garcia, J.G.N., *CD44 regulates hepatocyte growth factor-mediated vascular integrity. Role of c-Met, Tiam1/Rac1, dynamin 2, and cortactin.* *J Biol Chem*, 2007. **282**(42): p. 30643-57.
3. J Bin, L., Kim, B.E., Hall, C.F., Leach, S.M., Leung, D.Y.M., Inhibition of transcription factor specificity protein 1 alters the gene expression profile of keratinocytes leading to upregulation of kallikrein-related peptidases and thymic stromal lymphopoietin. *J Invest Dermatol*, 2011. **131**(11): p. 2213-22.
4. Mackman, N., *Regulation of the tissue factor gene.* *FASEB journal : official publication of the Federation of American Societies for Experimental Biology*, 1995. **9**(10): p. 883-9.
